# Supplementary material for: Evaluation of a Novel Synthetic Peptide Derived from Cytolytic Mycotoxin Candidalysin
Source: MDPI journal article supplement (doi:10.3390/toxins14100696), 2022-10-11
Supplement: s1 [file s1]

# Supplementary Materials: Evaluation of a Novel Synthetic Peptide Derived from Cytolytic Mycotoxin Candidalysin

Pedro Henrique de Oliveira Cardoso, Ana Paula de Araújo Boleti, Patrícia Souza e Silva, Lincoln Takashi Hota Mukoyama, Alexya Sandim Guindo, Luiz Filipe Ramalho Nunes de Moraes, Caio Fernando Ramalho de Oliveira, Maria Ligia Rodrigues Macedo, Cristiano Marcelo Espínola Carvalho, Alinne Pereira de Castro and Ludovico Migliolo

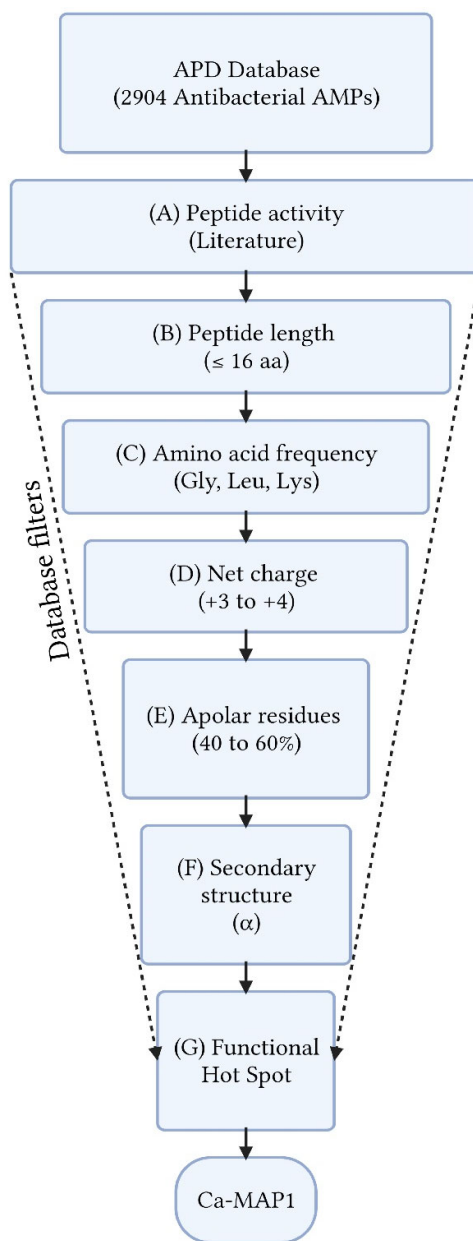

**Figure S1.** Database filtering technology schematic: (A) Candidalysin activity, (B) Determination of peptide length, (C) Amino acids frequency, (D) Net charge, (E) Hydrophobic content, (F) Structure type (F) Functional hot spot. The designed peptide is called Ca-MAP1.

**Table S1.** Strategy for the selection of peptide based on physical chemical parameters of candidalysin. Legend: <H> = Hydrophobicity in the Eisenberg scale; <μH> = Hydrophobic moment.

| Sequence                         | Length | Net charge | Nonpolar residues (%) | <H>    | <μH>  |
|----------------------------------|--------|------------|-----------------------|--------|-------|
| SIIGIIMGILGNIPQVIQIIMSIVKAFKGNKR | 32     | +4         | 56.25                 | 0.679  | 0.408 |
| SIIGIIMGILGNIPQV-----            | 16     | 0          | 62.50                 | 0.926  | 0.526 |
| -----IQIIMSIVKAFKGNKR            | 16     | +4         | 50.00                 | 0.432  | 0.409 |
| -----QIIMSIVKAFKGNKR             | 15     | +4         | 46.67                 | 0.341  | 0.446 |
| -----IIMSIVKAFKGNKR              | 14     | +4         | 50.00                 | 0.381  | 0.463 |
| -----IMSIVKAFKGNKR               | 13     | +4         | 46.15                 | 0.272  | 0.439 |
| -----MSIVKAFKGNKR                | 12     | +4         | 41.67                 | 0.144  | 0.350 |
| -----SIVKAFKGNKR                 | 11     | +4         | 36.36                 | 0.045  | 0.472 |
| -----IVKAFKGNKR                  | 10     | +4         | 40.00                 | 0.054  | 0.518 |
| -----VKAFKGNKR                   | 9      | +4         | 33.33                 | -0.140 | 0.381 |
| -----IQIIMSIVKAFKGNK-            | 15     | +3         | 53.33                 | 0.528  | 0.382 |
| -----IQIIMSIVKAFKGN--            | 14     | +2         | 57.14                 | 0.636  | 0.464 |
| -----IQIIMSIVKAFKG---            | 13     | +2         | 61.54                 | 0.732  | 0.521 |
| -----IQIIMSIVKAFK----            | 12     | +2         | 66.67                 | 0.792  | 0.565 |
| -----IQIIMSIVKAF-----            | 11     | +1         | 72.73                 | 0.955  | 0.607 |
| -----IQIIMSIVKA-----             | 10     | +1         | 70.00                 | 0.871  | 0.491 |
| -----MSIVKAFKG-----              | 9      | +2         | 55.56                 | 0.481  | 0.477 |
| -----QIIMSIVKAFKGNK-             | 14     | +3         | 50.00                 | 0.437  | 0.410 |
| -----IIMSIVKAFKGN--              | 12     | +2         | 58.33                 | 0.611  | 0.507 |
| -----IMSIVKAFKG---               | 10     | +2         | 60.00                 | 0.613  | 0.593 |

**Table S2.** Antibioqram assay against Gram-negative and -positive bacteria. (+) resistant at the concentrations tested.

| Microorganism                                      | Amoxicilin  | Imipenem    | Eritromicin | Ampicilin   |
|----------------------------------------------------|-------------|-------------|-------------|-------------|
| Gram-negative                                      | >350.3 (μM) | >427.6 (μM) | >174.4 (μM) | >366.3 (μM) |
| <i>Acinetobacter baumannii</i> (clinical isolated) | +           | +           | +           | +           |
| <i>Escherichia coli</i> (clinical isolated)        | +           | +           | +           | +           |
| <i>Escherichia coli</i> (KPC)                      | +           | +           | +           | +           |
| <i>Klebsiella pneumoniae</i> (ATCC)                | +           | +           | +           | +           |
| <i>Klebsiella pneumoniae</i> (KPC)                 | +           | +           | +           | +           |
| <i>Pseudomonas aeruginosa</i> (ATCC)               | +           | +           | +           | +           |
| Gram-positive                                      |             |             |             |             |
| <i>Staphylococcus aureus</i> (clinical isolated)   | +           | +           | +           | +           |
